# Supplementary material
Source: PubMed Central journal article supplement (PMC5244483)

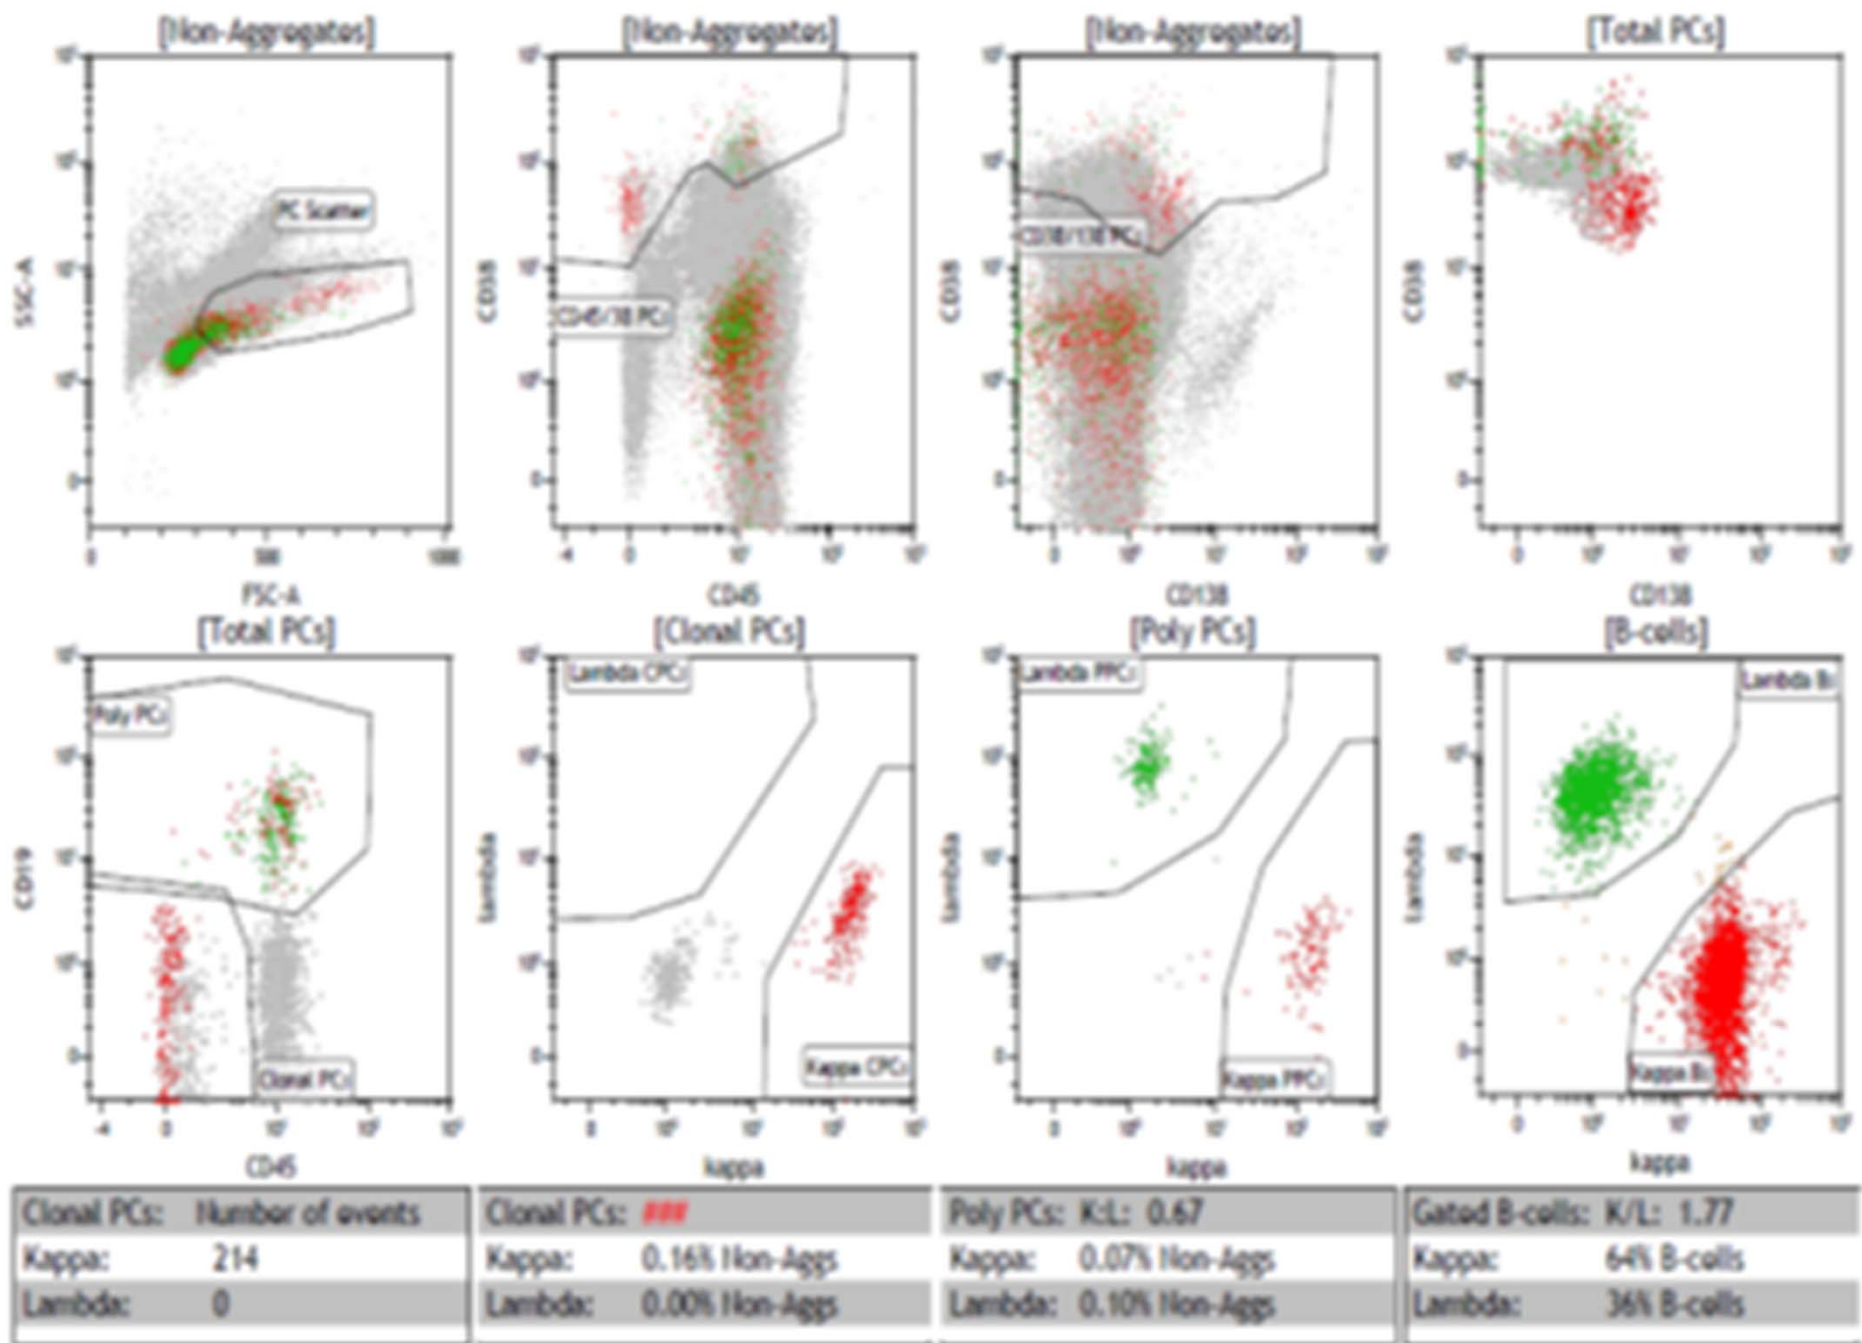

Supplemental Figure 1

Supplement: NIHMS842549-supplement-SuppFig1.pdf [file NIHMS842549-supplement-SuppFig1.pdf]

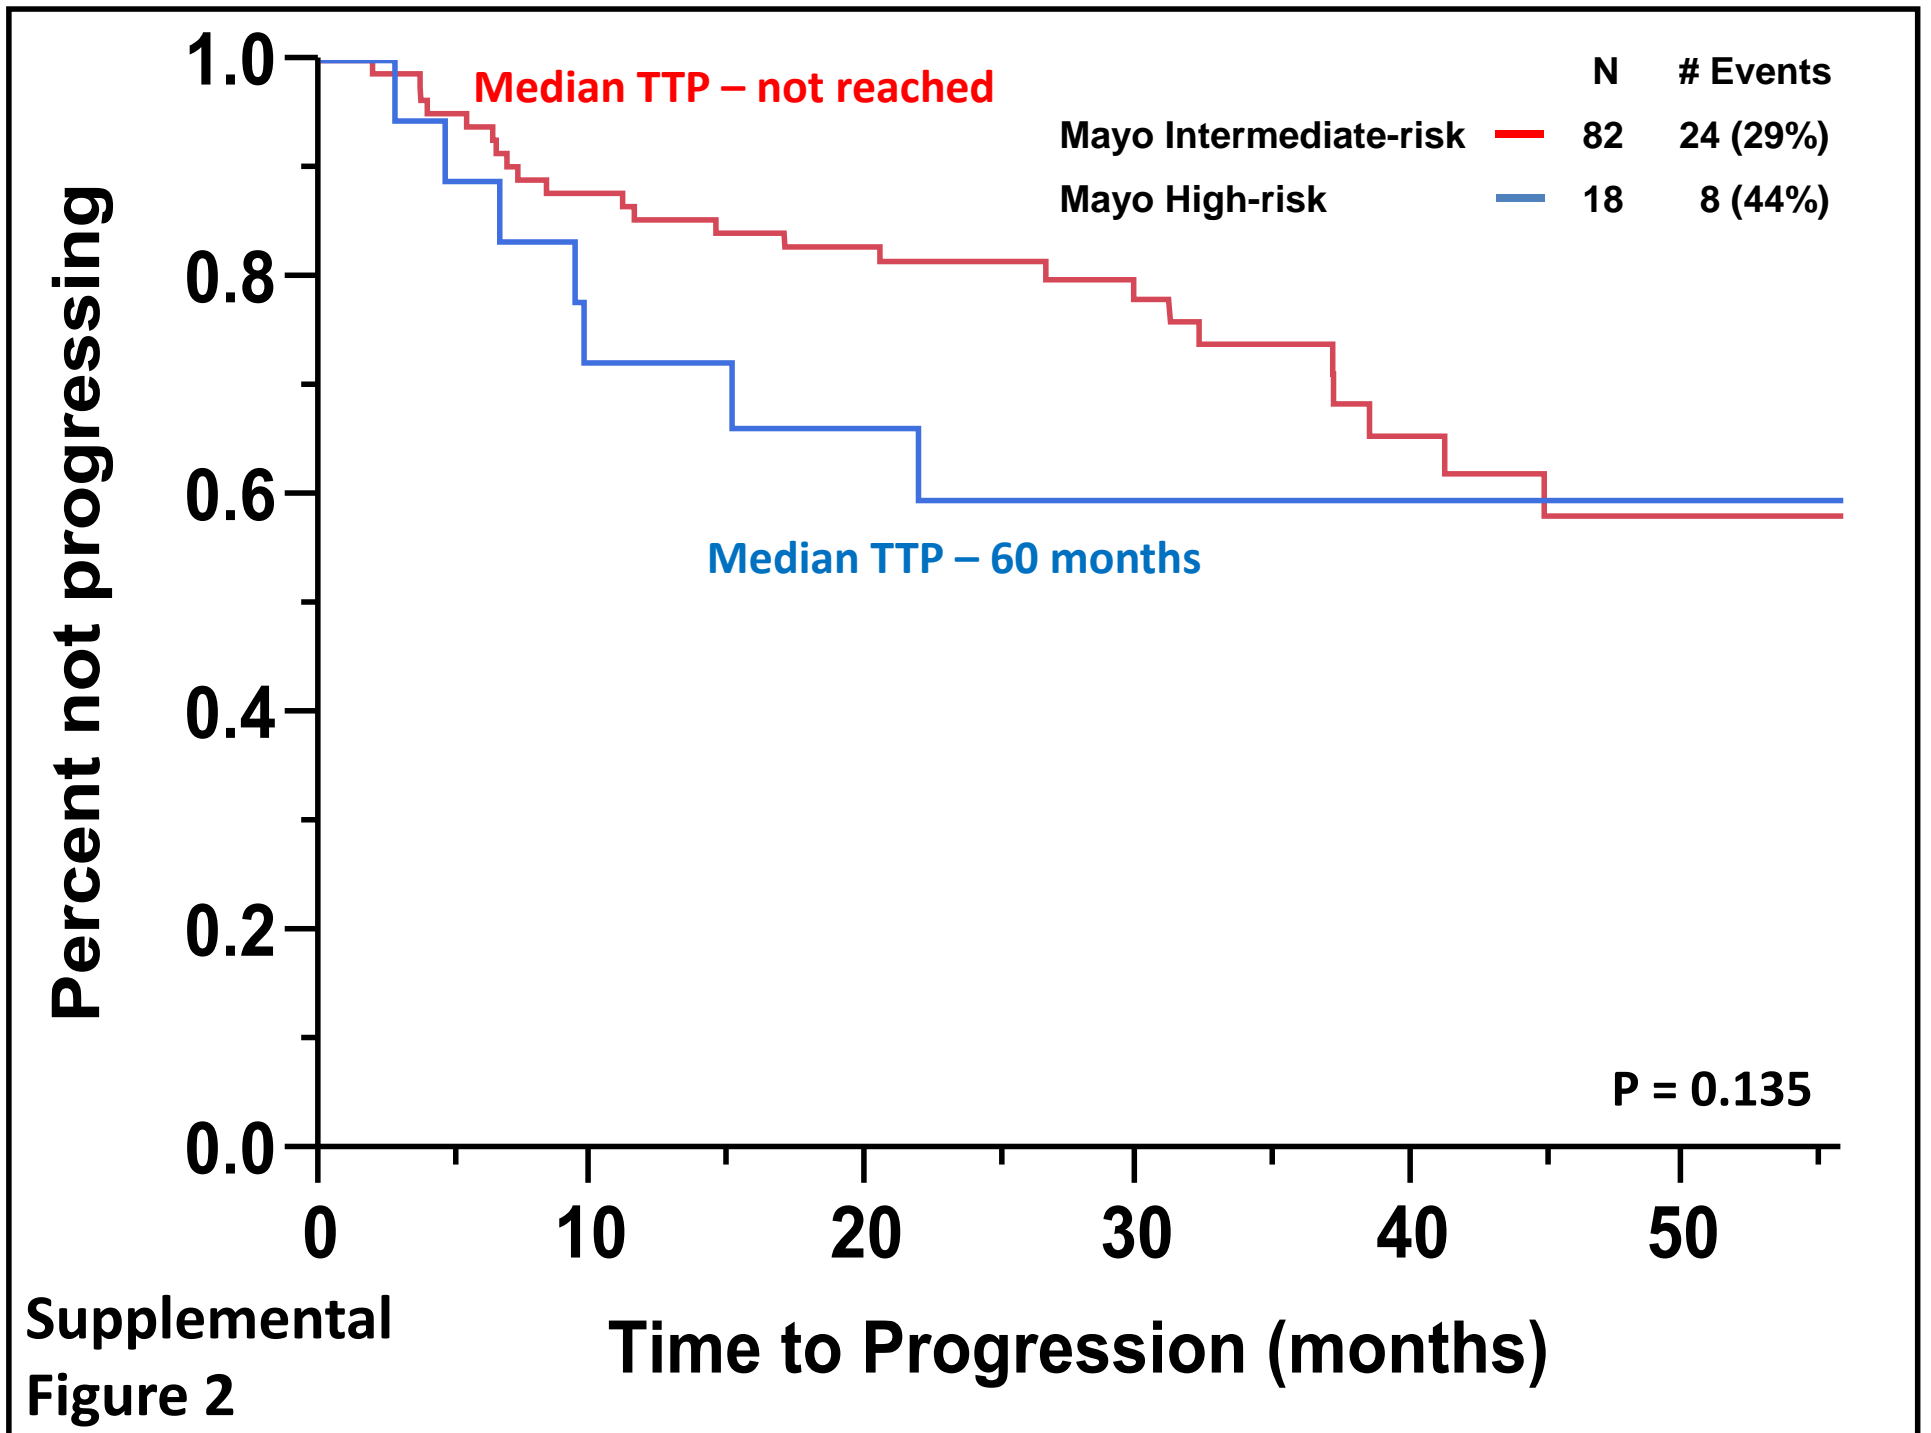

Supplement: NIHMS842549-supplement-SuppFig2.pdf [file NIHMS842549-supplement-SuppFig2.pdf]
